# Supplementary material for: Whole Mitochondrial DNA Sequencing Using Fecal Samples From Domestic Dogs
Source: Preprints.org preprint supplement (doi:10.20944/preprints202408.1864.v1), 2024-08-27
Supplement: Supplementary file 1 [file supplementary]

## Sheet: Sheet1
		Table S1: The sequence of each primer
		Name	Sequence	Amplicon size (bp)	Start / end
		Pr-1_F	GACGAGAAGACCCTATGGAGC	4722	2143
		Pr-1_R	CGAACGTGTGGTATGGAGGG		6864
		Pr-2_F	ACATGCTAGCCATCATCCCTAT	5343	4020
		Pr-2_R	TCATGCAGCGGCTTCAAATC		9363
		Pr-3_F	ACGCTATTACAGGCCTCCGA	5108	9163
		Pr-3_R	AAGCAGAGATGTTAGACGGCG		14270
		Pr-4_F	AGCAAGCAGTCAACAATTCAGAC	5723	13794-16727
		Pr-4_R	GCTACGGCAAGAAGGATTGG		2790
		Pr: Primer
